# Supplementary material for: Spinal Solitary Fibrous Tumors: An Original Multicenter Series and Systematic Review of Presentation, Management, and Prognosis
Source: MDPI journal article supplement (doi:10.3390/cancers14122839), 2022-06-08
Supplement: s1 [file s1]

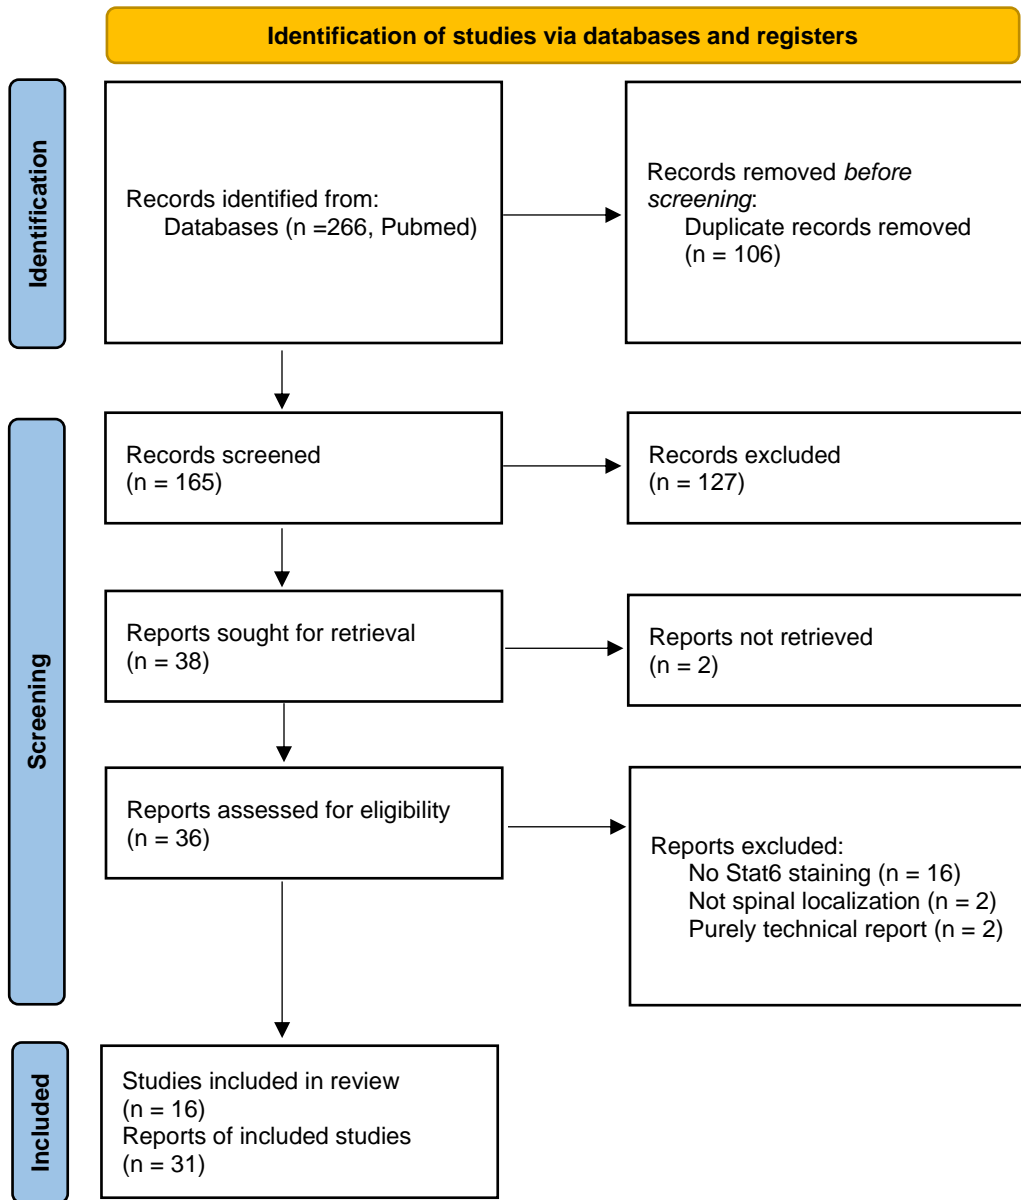

Sup. Figure S1: Flow-chart of the literature review for systematic review according to the PRSIMA guidelines (adapted from Page et al, 2021).

Sup. Table S1: Detailed anonymous data retrieval from our series and the systematic literature review for Stat6 positive spinal SFT/HPC (csv file).
