# Supplementary material for: Spinal Solitary Fibrous Tumors: An Original Multicenter Series and Systematic Review of Presentation, Management, and Prognosis
Source: Cancers (Basel). 2022 Jun 8;14(12):2839. doi: 10.3390/cancers14122839 (PMC9221085; doi:10.3390/cancers14122839)
Supplement: Supplementary file 1 [file cancers-14-02839-s001.zip › Sup Table S1.xlsx]

## Sheet: Review patients
				Sex	Age	Motor	Sensory	Radicular	Urinary	Spinal compression	Back pain	Duration preoperative symptoms (Mo)	Location	Type Liu classification	Surgical resection	Medullary invasion	Adjuvant treatment	Recurrence (mo)	post recurrence treatment	duration of follow-up	WHO grade
Recurrent solitary fibrous tumor of lumbar spine with vertebral body involvement: imaging features and differential diagnosis with report of a case	Farooq Z, Badar Z, Zaccarini D, Tavernier FB, Mohamed A, Mangla R.	Radiol Case Rep	2016	M	50	0	1	1	0	0	1	50	L1	IIB	subtotal	extramedullary	no	264	CIRT, proton therapy, second surgery	276	NA
Solitary fibrous tumors of the spine: a pediatric case report with a comprehensive review of the literature	Albert GW, Gokden M.	J Neurosurg Pediatr	2017	m	10	1	0	1	0	1	0	NA	c1-c3		GTR	extramedullary	No	no		12	2
A malignant solitary fibrous tumour arising from the first lumbar vertebra and mimicking an osteosarcoma: a case report	Oike N, Kawashima H, Ogose A, Hotta T, Hirano T, Ariizumi T, Yamagishi T, Umezu H, Inagawa S, Endo N.	World J Surg Oncol	2017	F	49	0	0	0	0	0	1	2	L1	III	GTR	extramedullary	Neoadjuvant chemotherapy	no		96	NA
Reappraisal of morphological and immunohistochemical spectrum of intracranial and spinal solitary fibrous tumors/hemangiopericytomas with impact on long-term follow-up	Shukla P, Gulwani HV, Kaur S, Shanmugasundaram D.	Indian J Cancer	2018	m	13	0	0					NA	T8	IIA	GTR	extramedullary	no	no		48	3
Solitary fibrous tumour/haemangiopericytoma of the spinal cord	Flores-Justa A, López-García E, García-Allut A, Reyes-Santías RM.	Neurocirugia (Astur : Engl Ed)	2018	f	63	1	1	0	0	1	0	NA	T9-T10	IIB	GTR	intramedullary	no	no		0	1
Papillary Solitary Fibrous Tumor/Hemangiopericytoma: An Uncommon Morphological Form With NAB2-STAT6 Gene Fusion	Yao ZG, Wu HB, Hao YH, Wang XF, Ma GZ, Li J, Li JF, Lin CH, Zhong XM, Wang Z, Wang DZ.	J Neuropathol Exp Neurol	2019	M	66	0	0	0	0	0	1	NA	T11-T12	IA	GTR	NA	no	no		50	NA
Dumbbell-shaped solitary fibrous tumor of thoracic spine	Su HY, Tsai TH, Yang SF, Lee JY.	Kaohsiung J Med Sci	2019	F	46	1	1	0	0	1	0	72	T4-T6	IB	GTR	extramedullary	no	no		0	1
Solitary fibrous tumor: A clinical case	Mansilla Fernández B, Román de Aragón M, Paz Solís JF, García Feijoo P, Roda Frade J, Regojo Zapata MR.	Neurocirugia (Astur : Engl Ed)	2019	f	48	0	1	0	1	1	1	2	T3-T4	IIB	GTR	intramedullary	no	no		0	1
Solitary fibrous tumor of the lumbar spine resembling schwannoma: a case report and review of the literature	Zhang YW, Xiao Q, Zeng JH, Deng L.	World Neurosurg	2019	m	40	0	0	1	1	0	1	131	L4	III	GTR	NA	No	36	surgical resection + radiotherapy	72	1
Spinal solitary fibrous tumor of the neck: Next-generation sequencing-based analysis of genomic aberrations	Ando M, Kobayashi H, Shinozaki-Ushiku A, Chikuda H, Matsubayashi Y, Yoshida M, Saito Y, Kohsaka S, Oda K, Miyagawa K, Aburatani H, Mano H, Yamasoba T.	Auris Nasus Larynx	2020	m	57	NA	NA	NA	NA	NA	NA	NA	C2-C3	III	GTR	NA	no	no		0	NA
Salvage carbon ion radiotherapy for recurrent solitary fibrous tumor: A case report and literature review	Murata K, Endo K, Aihara T, Matsuoka Y, Nishimura H, Suzuki H, Sawaji Y, Yamamoto K, Fukami S, Tanigawa M, Matsubayashi J, Nagao T, Imai R.	J Orthop Surg (Hong Kong)	2020	f	49	0	0	0	0	0	1	12	T6	III	GTR	extramedullary	no	12	CIRT	31	3
How to differentiate spinal cord hemangiopericytoma from common spinal cord tumor?	Dauleac C, Vasiljevic A, Berhouma M.	Neurochirurgie	2020	m	67	0	1	0	0	1	0	NA	T8-T9	IIB	GTR	extramedullary	no	no		18	1
Invasive Solitary Fibrous Tumor/Hemangiopericytoma of the Filum Terminale	Wei D, Ma M, Li H.	World Neurosurg	2020	M	37	0	0	0	0	0	1	84	L4-L5	IIB	GTR	intramedullary	No	No		36	1
Primary endodermal hemangiopericytoma/solitary fibrous tumor of the cervical spine: a case report and literature review	Wang L, Yu J, Shu D, Huang B, Wang Y, Zhang L.	BMC Surg	2021	F	53	0	0	1	0	1	0	1	C6-C7	IIA	GTR	extramedullary	no	no		0	3
Intradural Extramedullary Solitary Fibrous Tumor of the Thoracic Spinal Cord	Olmsted ZT, Tabor J, Doron O, Hosseini H, Schneider D, Green R, Wahl SJ, Sciubba DM, D'Amico RS.	Cureus	2021	F	81	1	1	0	0	1	0	8	T11-T12	IIA	subtotal	extramedullary	no	no		6	3
Solitary Fibrous Tumor/Hemangiopericytoma of Spinal Cord: A Retrospective Single-Center Study of 16 Cases	Wang J, Zhao K, Han L, Jiao L, Liu W, Xu Y, Niu H, Ke C, Shu K, Lei T.	World Neurosurg	2019	m	38	0	0	0	0	0	1	25	T5-T7		subtotal	intramedullary	no	26	NA	59	NA
Solitary Fibrous Tumor/Hemangiopericytoma of Spinal Cord: A Retrospective Single-Center Study of 16 Cases	Wang J, Zhao K, Han L, Jiao L, Liu W, Xu Y, Niu H, Ke C, Shu K, Lei T.	World Neurosurg	2019	f	34	0	0	0	0	0	1	5	C6-C7		GTR	extramedullary	no	no		24	NA
Solitary Fibrous Tumor/Hemangiopericytoma of Spinal Cord: A Retrospective Single-Center Study of 16 Cases	Wang J, Zhao K, Han L, Jiao L, Liu W, Xu Y, Niu H, Ke C, Shu K, Lei T.	World Neurosurg	2019	m	49	0	0	0	0	0	1	4	T4		GTR	extramedullary	no	no		35	NA
Solitary Fibrous Tumor/Hemangiopericytoma of Spinal Cord: A Retrospective Single-Center Study of 16 Cases	Wang J, Zhao K, Han L, Jiao L, Liu W, Xu Y, Niu H, Ke C, Shu K, Lei T.	World Neurosurg	2019	f	37	0	0	0	0	0	1	2	T6		GTR	extramedullary	no	22	radiotherapy	62	NA
Solitary Fibrous Tumor/Hemangiopericytoma of Spinal Cord: A Retrospective Single-Center Study of 16 Cases	Wang J, Zhao K, Han L, Jiao L, Liu W, Xu Y, Niu H, Ke C, Shu K, Lei T.	World Neurosurg	2019	m	57	0	0	0	0	0	1	9	T3-T4		GTR	extramedullary	no	no		67	NA
Solitary Fibrous Tumor/Hemangiopericytoma of Spinal Cord: A Retrospective Single-Center Study of 16 Cases	Wang J, Zhao K, Han L, Jiao L, Liu W, Xu Y, Niu H, Ke C, Shu K, Lei T.	World Neurosurg	2019	f	33	0	0	0	0	0	1	1	T9-T10		GTR	extramedullary	radiotherapy	no		70	NA
Solitary Fibrous Tumor/Hemangiopericytoma of Spinal Cord: A Retrospective Single-Center Study of 16 Cases	Wang J, Zhao K, Han L, Jiao L, Liu W, Xu Y, Niu H, Ke C, Shu K, Lei T.	World Neurosurg	2019	f	42	0	0	0	0	0	1	4	C5-C6		GTR	intramedullary	radiotherapy	no		76	NA
Solitary Fibrous Tumor/Hemangiopericytoma of Spinal Cord: A Retrospective Single-Center Study of 16 Cases	Wang J, Zhao K, Han L, Jiao L, Liu W, Xu Y, Niu H, Ke C, Shu K, Lei T.	World Neurosurg	2019	f	43	0	0	0	0	0	1	12	T8		GTR	extramedullary	radiotherapy	49	radiotherapy	85	NA
Solitary Fibrous Tumor/Hemangiopericytoma of Spinal Cord: A Retrospective Single-Center Study of 16 Cases	Wang J, Zhao K, Han L, Jiao L, Liu W, Xu Y, Niu H, Ke C, Shu K, Lei T.	World Neurosurg	2019	m	21	0	0	0	0	0	1	9	T3-T4		GTR	extramedullary	radiotherapy	no		96	NA
Solitary Fibrous Tumor/Hemangiopericytoma of Spinal Cord: A Retrospective Single-Center Study of 16 Cases	Wang J, Zhao K, Han L, Jiao L, Liu W, Xu Y, Niu H, Ke C, Shu K, Lei T.	World Neurosurg	2019	f	45	0	0	0	0	0	1	32	C5-C7		Subtotal	extramedullary	no	35	surgery	110	NA
Solitary Fibrous Tumor/Hemangiopericytoma of Spinal Cord: A Retrospective Single-Center Study of 16 Cases	Wang J, Zhao K, Han L, Jiao L, Liu W, Xu Y, Niu H, Ke C, Shu K, Lei T.	World Neurosurg	2019	f	40	1	0	1	0	0	1	7	T11-T12		Subtotal	extramedullary	radiotherapy	no		42	NA
Solitary Fibrous Tumor/Hemangiopericytoma of Spinal Cord: A Retrospective Single-Center Study of 16 Cases	Wang J, Zhao K, Han L, Jiao L, Liu W, Xu Y, Niu H, Ke C, Shu K, Lei T.	World Neurosurg	2019	f	35	1	0	1	0	0	1	3	C4-C6		Subtotal	extramedullary	no	32	NA	66	NA
Solitary Fibrous Tumor/Hemangiopericytoma of Spinal Cord: A Retrospective Single-Center Study of 16 Cases	Wang J, Zhao K, Han L, Jiao L, Liu W, Xu Y, Niu H, Ke C, Shu K, Lei T.	World Neurosurg	2019	m	48	1	0	1	0	0	1	6	T9-T10		Subtotal	intramedullary	no	21	surgery	80	NA
Solitary Fibrous Tumor/Hemangiopericytoma of Spinal Cord: A Retrospective Single-Center Study of 16 Cases	Wang J, Zhao K, Han L, Jiao L, Liu W, Xu Y, Niu H, Ke C, Shu K, Lei T.	World Neurosurg	2019	f	47	1	0	1	0	0	1	10	L1		GTR	intramedullary	radiotherapy	no		82	NA
Solitary Fibrous Tumor/Hemangiopericytoma of Spinal Cord: A Retrospective Single-Center Study of 16 Cases	Wang J, Zhao K, Han L, Jiao L, Liu W, Xu Y, Niu H, Ke C, Shu K, Lei T.	World Neurosurg	2019	m	66	1	0	0	0	1	1	14	L2-L3		Subtotal	intramedullary	no	25	NA	47	NA
Solitary Fibrous Tumor/Hemangiopericytoma of Spinal Cord: A Retrospective Single-Center Study of 16 Cases	Wang J, Zhao K, Han L, Jiao L, Liu W, Xu Y, Niu H, Ke C, Shu K, Lei T.	World Neurosurg	2019	f	46	0	0	0	1	1	0	6	L3-L5		Subtotal	intramedullary	no	19	surgery	58	NA

## Sheet: Our series
	Sex	Age	Motor	Sensory	Radicular	Urinary	Spinal compression	Back pain	Duration preoperative symptoms (Mo)	Location	Type Liu classification	Surgical resection	Medullary invasion	Adjuvant treatment	Recurrence (mo)	post recurrence treatment	duration of follow-up	WHO grade
1	f	38	1	1	1	1	1	1	11	C1-C2	IIA	GTR	extramedullary	no	165	surgery	213	NA
2	m	44	0	0	1	0	1	1	36	L3	III	GTR	extramedullary	no	12	Surgery + radiotherapy	37	2
3	f	43	0	1	0	0	1	0	5	T1	IIB +IIA	subtotal	intramedullary	RT	no		35	2
4	m	66	0	0	1	0	1	0	6	C1-C2	IIA+IIB	subtotal	intramedullary	yes radiothérapie	no		29	3
5	f	47	1	0	1	0	0	1	9	T11	IIA	GTR	extramedullary	no	no		12	2
6	f	71	0	0	0	1	1	1	4	C2-C3	III	GTR	extramedullary	RT	no		20	2
7	m	32	1	0	0	1	1	0	6	T3	IIA+ IIB	GTR	intramedullary	no	no		19	1
8	m	44	1	0	1	0	0	0	4	C1	IIA	GTR	extramedullary	no	no		22	3
9	m	39	0	1	0	0	1	0		C4 C5 C6	IIA	GTR	extramedullary	radiotherapy après 3 chirurgies	300	surgery + radiotherapy + pazopanib	360	3
10	m	47	1	1	1	1	0	1	12	T9-T10 & T11	IIB	subtotal	intramedullary	RT	36	Surgery	70	2

## Sheet: All_patients
ID	Sex	Age	Motor	Sensory	Radicular	Urinary	Spinal compression	Back pain	Duration preoperative symptoms (Mo)	Location	Type Liu classification	Surgical resection	Medullary invasion	Adjuvant treatment	Recurrence (mo)	post recurrence treatment	duration of follow-up	WHO grade
1	f	38	1	1	1	1	1	1	11	C1-C2	IIA	GTR	extramedullary	no	165	surgery	213	NA
2	m	44	0	0	1	0	1	1	36	L3	III	GTR	extramedullary	no	12	Surgery + radiotherapy	37	2
3	f	43	0	1	0	0	1	0	5	T1	IIB +IIA	subtotal	intramedullary	RT	no		35	2
4	m	66	0	0	1	0	1	0	6	C1-C2	IIA+IIB	subtotal	intramedullary	yes radiothérapie	no		29	3
5	f	47	1	0	1	0	0	1	9	T11	IIA	GTR	extramedullary	no	no		12	2
6	f	71	0	0	0	1	1	1	4	C2-C3	III	GTR	extramedullary	RT	no		20	2
7	m	32	1	0	0	1	1	0	6	T3	IIA+ IIB	GTR	intramedullary	no	no		19	1
8	m	44	1	0	1	0	0	0	4	C1	IIA	GTR	extramedullary	no	no		22	3
9	m	39	0	1	0	0	1	0		C4 C5 C6	IIA	GTR	extramedullary	radiotherapy après 3 chirurgies	300	surgery + radiotherapy + pazopanib	360	3
10	m	47	1	1	1	1	0	1	12	T9-T10 & T11	IIB	subtotal	intramedullary	RT	36	Surgery	70	2
11	M	50	0	1	1	0	0	1	50	L1	IIB	subtotal	extramedullary	no	264	CIRT, proton therapy, second surgery	276	NA
12	m	10	1	0	1	0	1	0	NA	c1-c3		GTR	extramedullary	No	no		12	2
13	F	49	0	0	0	0	0	1	2	L1	III	GTR	extramedullary	Neoadjuvant chemotherapy	no		96	NA
14	m	13	0	0					NA	T8	IIA	GTR	extramedullary	no	no		48	3
15	f	63	1	1	0	0	1	0	NA	T9-T10	IIB	GTR	intramedullary	no	no		0	1
16	M	66	0	0	0	0	0	1	NA	T11-T12	IA	GTR	NA	no	no		50	NA
17	F	46	1	1	0	0	1	0	72	T4-T6	IB	GTR	extramedullary	no	no		0	1
18	f	48	0	1	0	1	1	1	2	T3-T4	IIB	GTR	intramedullary	no	no		0	1
19	m	40	0	0	1	1	0	1	131	L4	III	GTR	NA	No	36	surgical resection + radiotherapy	72	1
20	m	57	NA	NA	NA	NA	NA	NA	NA	C2-C3	III	GTR	NA	no	no		0	NA
21	f	49	0	0	0	0	0	1	12	T6	III	GTR	extramedullary	no	12	CIRT	31	3
22	m	67	0	1	0	0	1	0	NA	T8-T9	IIB	GTR	extramedullary	no	no		18	1
23	M	37	0	0	0	0	0	1	84	L4-L5	IIB	GTR	intramedullary	No	No		36	1
24	F	53	0	0	1	0	1	0	1	C6-C7	IIA	GTR	extramedullary	no	no		0	3
25	F	81	1	1	0	0	1	0	8	T11-T12	IIA	subtotal	extramedullary	no	no		6	3
26	m	38	0	0	0	0	0	1	25	T5-T7		subtotal	intramedullary	no	26	NA	59	NA
27	f	34	0	0	0	0	0	1	5	C6-C7		GTR	extramedullary	no	no		24	NA
28	m	49	0	0	0	0	0	1	4	T4		GTR	extramedullary	no	no		35	NA
29	f	37	0	0	0	0	0	1	2	T6		GTR	extramedullary	no	22	radiotherapy	62	NA
30	m	57	0	0	0	0	0	1	9	T3-T4		GTR	extramedullary	no	no		67	NA
31	f	33	0	0	0	0	0	1	1	T9-T10		GTR	extramedullary	radiotherapy	no		70	NA
32	f	42	0	0	0	0	0	1	4	C5-C6		GTR	intramedullary	radiotherapy	no		76	NA
33	f	43	0	0	0	0	0	1	12	T8		GTR	extramedullary	radiotherapy	49	radiotherapy	85	NA
34	m	21	0	0	0	0	0	1	9	T3-T4		GTR	extramedullary	radiotherapy	no		96	NA
35	f	45	0	0	0	0	0	1	32	C5-C7		Subtotal	extramedullary	no	35	surgery	110	NA
36	f	40	1	0	1	0	0	1	7	T11-T12		Subtotal	extramedullary	radiotherapy	no		42	NA
37	f	35	1	0	1	0	0	1	3	C4-C6		Subtotal	extramedullary	no	32	NA	66	NA
38	m	48	1	0	1	0	0	1	6	T9-T10		Subtotal	intramedullary	no	21	surgery	80	NA
39	f	47	1	0	1	0	0	1	10	L1		GTR	intramedullary	radiotherapy	no		82	NA
40	m	66	1	0	0	0	1	1	14	L2-L3		Subtotal	intramedullary	no	25	NA	47	NA
41	f	46	0	0	0	1	1	0	6	L3-L5		Subtotal	intramedullary	no	19	surgery	58	NA
